# Supplementary material
Source: PubMed Central journal article supplement (PMC11028934)
Supplement: 262_2016_1916_MOESM1_ESM.pdf [file 262_2016_1916_MOESM1_ESM.pdf]

# Cancer Immunology, Immunotherapy (submitted in 2016) – Andrew Zloza et al.

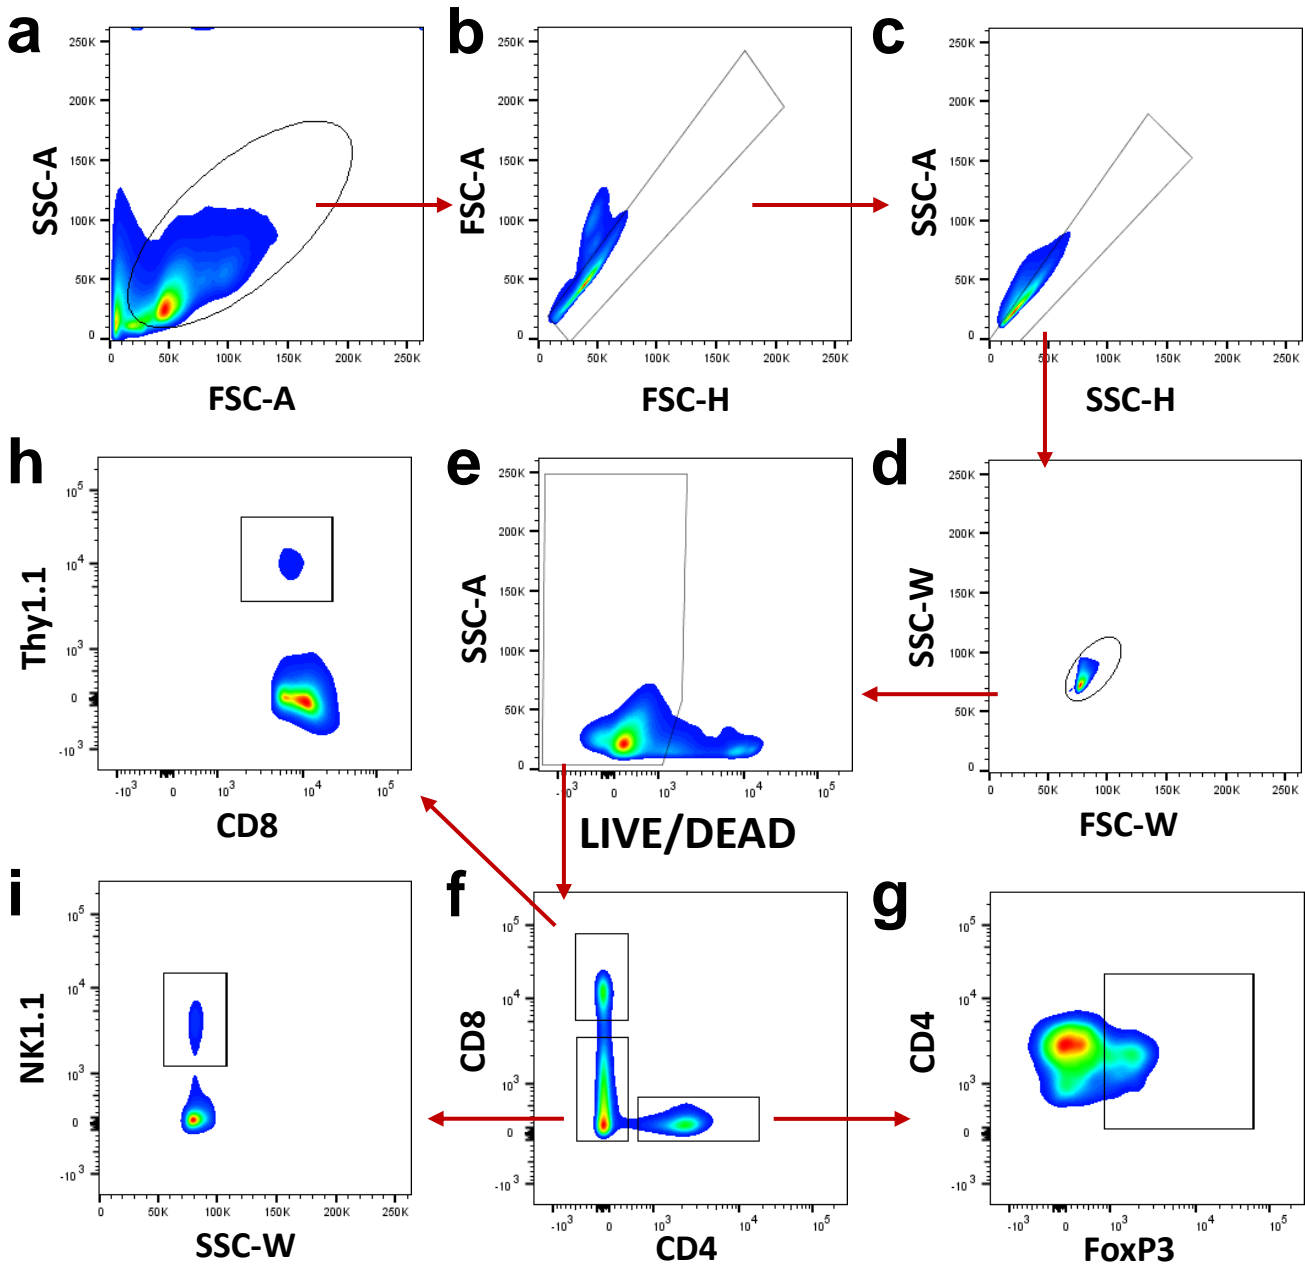

**Supplementary Figure S1. Flow cytometry gating.** Schematic for flow cytometry analysis with gating on (a-d) singlet, (e) live, (f, g) CD4+ regulatory T cells, (f, h) Thy1.1-expressing Pmel CD8+ T cells, and (f, i) NK cells.
